# Supplementary material for: Generalized energy-based fragmentation approach for calculations of solvation energies of large systems
Source: Royal Society of Chemistry journal article supplement (doi:10.1039/d1cp02814f), 2021-01-01
Supplement: d1cp02814f1.pdf [file d1cp02814f1.pdf]

**Electronic Supplementary Information for**

**Generalized energy-based fragmentation approach for calculations  
of solvation energies of large systems**

Kang Liao, Shirong Wang, Wei Li\* and Shuhua Li\*

*School of Chemistry and Chemical Engineering, Key Laboratory of Mesoscopic  
Chemistry of Ministry of Education, Institute of Theoretical and Computational  
Chemistry, Nanjing University, Nanjing, 210023, P. R. China.*

*E-mail: wli@nju.edu.cn, shuhua@nju.edu.cn*

## 1. The Derivation of GEBF-SMD Electronic-Polarization Energy

We will derive the GEBF-SMD electronic-polarization (EP) energy of a target system in solution (with solute cavity), as displayed in Fig. S1(I). In all the subsequent equations, the cavitation-dispersion-solvent-reorganization (CDS) free energy term will not be included.

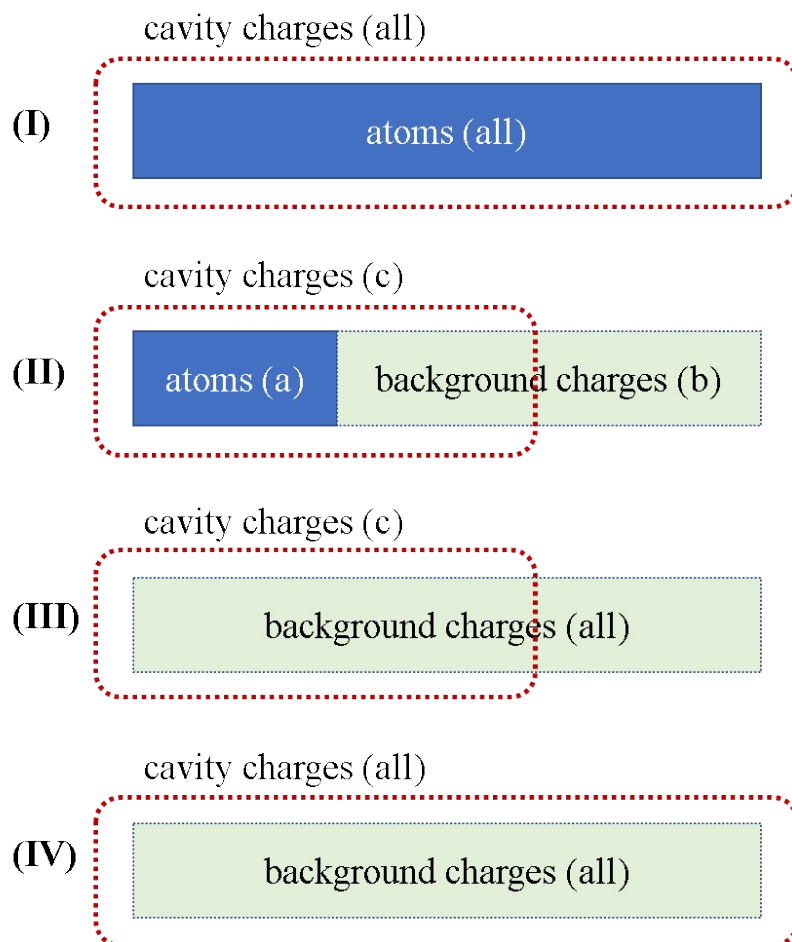

**Fig S1.** An illustration of systems to be calculated in the GEBF-SMD approach: (I) The entire system with full solute cavity; (II) An embedded subsystem ( $S_m$ ) with truncated cavity; (III) A pure charge system ( $S^{(m)}$ ) with truncated cavity, which is obtained by replacing the atoms with charges in  $S_m$ ; (IV) A pure charge system with full background point charges and full cavity. The atoms and background point charges are denoted as blue and light green rectangle, and the surface of solute cavity is denoted as dotted red box.

Firstly, the GEBF-SMD EP energy of the entire system in solution (I), i.e. Eq. (8) in the main text, can be approximately expressed as,

$$E_{EP}^{GEBF} = \sum_m C_m (E_m^{sol} - E_{(m)}^{sol}) + E_{(all)}^{sol} \quad (S1)$$

Here  $E_m^{sol}$  is the total energy of the  $m$ th embedded subsystem ( $S_m$ ) with truncated cavity [see Fig. S1 (II)],  $E_{(m)}^{sol}$  is the total energy of one pure charge system  $S_{(m)}$  [see Fig. S1(III)] with full background point charges and with the same truncation of cavity as in  $S_m$ , and  $E_{(all)}^{sol}$  is the total energy of a pure charge system with full background point charges and without truncation of cavity [see Fig. S1 (IV)]. Thus, in the GEBF-SMD approach, only the calculations on three types of systems (II, III, and IV) are needed, and the SMD calculation on the entire system is not required.

The total energy of the  $m$ th embedded subsystem ( $S_m$ ) with truncated cavity is expressed as follows,

$$E_m^{sol} = E_m^a + E_m^b + E_m^{a,b} + \frac{1}{2}E_m^{a,c} + \frac{1}{2}E_m^{b,c} \quad (S2)$$

Here the  $E_m^a$  and  $E_m^b$  are the energies of atoms (a) and background charges (b), respectively, as,

$$E_m^a = \langle \Psi_m | H_m^{(0)} | \Psi_m \rangle \quad (S3)$$

$$E_m^b = \sum_{A \in S_m} \sum_{B > A \in S_m} \frac{Q_A Q_B}{|r_A - r_B|} \quad (S4)$$

The  $E_m^{a,b}$  is the interaction energy between the atoms and background charges,

$$E_m^{a,b} = \left\langle \Psi_m \left| \sum_{A \in S_m} \frac{-Q_A}{|r - r_A|} \right| \Psi_m \right\rangle + \sum_{k \in S_m} \sum_{A \in S_m} \frac{Z_k Q_A}{|r_k - r_A|} \quad (S5)$$

The  $E_m^{a,c}$  is the interaction energy between the atoms and surface or cavity charges (c),

$$E_m^{a,c} = \left\langle \Psi_m \left| \sum_{s \in S_m} \frac{-q_s}{|r - r_s|} \right| \Psi_m \right\rangle + \sum_{k \in S_m} \sum_{s \in S_m} \frac{Z_k q_s}{|r_k - r_s|} \quad (\text{S6})$$

The  $E_m^{b,c}$  is the interaction energy between the background charges and surface or cavity charges (c),

$$E_m^{b,c} = \sum_{A \in S_m} \sum_{s \in S_m} \frac{Q_A q_s}{|r_A - r_s|} \quad (\text{S7})$$

It should be noted that in Eq. S1, the energy of surface or cavity charges (c),  $E_m^c$ , is not included, and only halves of  $E_m^{a,c}$  and  $E_m^{b,c}$  are incorporated in the SMD EP energy of the subsystem  $S_m$ .

By replacing the atoms in  $S_m$  with the corresponding point charges, we then obtain a pure charge system  $S^{(m)}$  with full background point charges and with the same truncation of cavity as in  $S_m$ . The total energy of  $S^{(m)}$  can be represented as,

$$E_{(m)}^{sol} = \sum_{A \in all B > A \in all} \frac{Q_A Q_B}{|r_A - r_B|} + \frac{1}{2} \sum_{A \in all s \in S_m} \frac{Q_A q_s}{|r_A - r_s|} \quad (\text{S8})$$

For a pure charge system with full background point charges and without truncation of cavity, its total energy is

$$E_{(all)}^{sol} = \sum_{A \in all B > A \in all} \frac{Q_A Q_B}{|r_A - r_B|} + \frac{1}{2} \sum_{A \in all s \in all} \frac{Q_A q_s}{|r_A - r_s|} \quad (\text{S9})$$

Finally, by substituting Eqs. S8 and S9 into Eq. S1, we can obtain the following expression as shown in the main text,

$E_{EP}^{GEBF}$ 

$$= \sum_m C_m \left( E_m^{sol} - \frac{1}{2} \sum_{A \in alls} \sum_{s \in S_m} \frac{Q_A q_s}{|r_A - r_s|} \right) + \frac{1}{2} \sum_{A \in alls} \sum_{s \in all} \frac{Q_A q_s}{|r_A - r_s|} - \left( \sum_m C_m - 1 \right) \sum_{A \in alls} \sum_{s \in S_m} \frac{Q_A q_s}{|r_A - r_s|}$$

(S10)

## 2. The GEBF-SMD energies of 2AJM in solution with different NPA charges

**Table S1.** The GEBF-SMD energies (in a.u.) of 2AJM in aqueous solution at the M06-2X/6-31G(d,p) level with the NPA charges obtained from three different types of subsystems.

| subsystem                                  | SCRF energy   |
|--------------------------------------------|---------------|
| naked                                      | -10868.994338 |
| embedded in background charges             | -10868.994383 |
| embedded in background and surface charges | -10868.994313 |
